# Supplementary material for: Effects of Antiviral Therapy and Glucocorticoid Therapy on Fever Duration in Pediatric Patients with Influenza
Source: MDPI journal article supplement (doi:10.3390/medicina57121385), 2021-12-20
Supplement: s1 [file s1]

**Table S1.** Results of the multivariate Cox regression analysis according to clinical diagnosis.

| Upper respiratory tract infection on admission |              |                         |                 |
|------------------------------------------------|--------------|-------------------------|-----------------|
| Factor                                         | Hazard ratio | 95% Confidence interval | <i>p</i> -value |
| Female (vs. male)                              | 1.057        | 0.887–1.261             | 0.538           |
| Age, years                                     | 0.955        | 0.934–0.977             | <0.001          |
| Pre-admission fever, days                      | 0.880        | 0.828–0.936             | <0.001          |
| Influenza B (vs. influenza A)                  | 1.427        | 1.178–1.727             | <0.001          |
| Type of administered treatment                 |              |                         |                 |
| No therapy                                     | reference    |                         |                 |
| NAI therapy                                    | 1.007        | 0.726–1.395             | 0.967           |
| GC therapy                                     | 0.993        | 0.698–1.414             | 0.971           |
| Both therapies                                 | 1.010        | 0.739–1.381             | 0.949           |
| Lower respiratory tract infection on admission |              |                         |                 |
| Factor                                         | Hazard ratio | 95% Confidence interval | <i>p</i> -value |
| Female (vs. male)                              | 1.098        | 0.678–1.779             | 0.705           |
| Age, years                                     | 0.947        | 0.878–1.020             | 0.153           |
| Pre-admission fever, days                      | 0.880        | 0.787–0.984             | 0.025           |
| Influenza B (vs. influenza A)                  | 0.663        | 0.411–1.070             | 0.092           |
| Type of administered treatment                 |              |                         |                 |
| No therapy                                     | reference    |                         |                 |
| NAI therapy                                    | 0.591        | 0.104–3.356             | 0.553           |
| GC therapy                                     | 0.388        | 0.086–1.748             | 0.217           |
| Both therapies                                 | 0.419        | 0.094–1.020             | 0.257           |

NAI, neuraminidase inhibitor; GC, glucocorticoid.

**Table S2.** Results of the multivariate Cox regression analysis according to influenza virus subtype.

| Influenza A virus infection    |              |                         |                 |
|--------------------------------|--------------|-------------------------|-----------------|
| Factor                         | Hazard ratio | 95% Confidence interval | <i>p</i> -value |
| Female (vs. male)              | 1.242        | 1.013–1.524             | 0.037           |
| Age, years                     | 0.973        | 0.948–1.000             | 0.046           |
| Pre-admission fever, days      | 0.839        | 0.779–0.803             | <0.001          |
| LRI on admission (vs. URI)     | 0.895        | 0.649–1.235             | 0.501           |
| Type of administered treatment |              |                         |                 |
| No therapy                     | reference    |                         |                 |
| NAI therapy                    | 0.799        | 0.531–1.203             | 0.282           |
| GC therapy                     | 0.705        | 0.462–1.076             | 0.106           |
| Both therapies                 | 0.802        | 0.544–1.181             | 0.264           |
| Influenza B virus infection    |              |                         |                 |
| Factor                         | Hazard ratio | 95% Confidence interval | <i>p</i> -value |
| Female (vs. male)              | 1.242        | 0.620–1.092             | 0.176           |
| Age, years                     | 0.929        | 0.896–0.964             | <0.001          |
| Pre-admission fever, days      | 0.896        | 0.829–0.969             | 0.006           |
| LRI on admission (vs. URI)     | 0.381        | 0.254–0.572             | <0.001          |
| Type of administered treatment |              |                         |                 |
| No therapy                     | reference    |                         |                 |
| NAI therapy                    | 1.114        | 0.658–1.883             | 0.689           |
| GC therapy                     | 1.031        | 0.583–1.821             | 0.918           |
| Both therapies                 | 0.982        | 0.591–1.631             | 0.945           |

LRI, lower respiratory tract infection; URI, upper respiratory tract infection; NAI, neuraminidase inhibitor; GC, glucocorticoid.

**Table S3.** Results of the multivariate Cox regression analysis according to the pre-admission fever duration.

| Pre-admission fever $\leq 2$ days |              |                         |                 |
|-----------------------------------|--------------|-------------------------|-----------------|
| Factor                            | Hazard ratio | 95% Confidence interval | <i>p</i> -value |
| Female (vs. male)                 | 1.063        | 0.886–1.276             | 0.515           |
| Age, years                        | 0.962        | 0.939–0.985             | 0.001           |
| Influenza B (vs. influenza A)     | 1.279        | 1.052–1.555             | 0.014           |
| LRI on admission (vs. URI)        | 0.673        | 0.498–0.911             | 0.010           |
| Type of administered treatment    |              |                         |                 |
| No therapy                        | reference    |                         |                 |
| NAI therapy                       | 1.005        | 0.693–1.458             | 0.980           |
| GC therapy                        | 1.042        | 0.705–1.538             | 0.839           |
| Both therapies                    | 1.038        | 0.727–1.481             | 0.836           |
| Pre-admission fever $> 2$ days    |              |                         |                 |
| Factor                            | Hazard ratio | 95% Confidence interval | <i>p</i> -value |
| Female (vs. male)                 | 0.816        | 0.536–1.242             | 0.342           |
| Age, years                        | 0.930        | 0.883–0.979             | 0.006           |
| Influenza B (vs. influenza A)     | 1.157        | 0.776–1.727             | 0.472           |
| LRI on admission (vs. URI)        | 0.556        | 0.347–0.891             | 0.015           |
| Type of administered treatment    |              |                         |                 |
| No therapy                        | reference    |                         |                 |
| NAI therapy                       | 1.134        | 0.585–2.198             | 0.710           |
| GC therapy                        | 0.688        | 0.339–1.397             | 0.301           |
| Both therapies                    | 0.852        | 0.457–1.590             | 0.614           |

LRI, lower respiratory tract infection; URI, upper respiratory tract infection; NAI, neuraminidase inhibitor; GC, glucocorticoid.

**Table S4.** Results of the multivariate Cox regression analysis according to patient age.

| Age of <5 years                |              |                         |                 |
|--------------------------------|--------------|-------------------------|-----------------|
| Factor                         | Hazard ratio | 95% Confidence interval | <i>p</i> -value |
| Female (vs. male)              | 0.978        | 0.783–1.224             | 0.850           |
| Pre-admission fever, days      | 0.907        | 0.848–0.970             | 0.004           |
| Influenza B (vs. influenza A)  | 1.381        | 1.082–1.764             | 0.010           |
| LRI on admission (vs. URI)     | 0.651        | 0.486–0.873             | 0.004           |
| Type of administered treatment |              |                         |                 |
| No therapy                     | reference    |                         |                 |
| NAI therapy                    | 1.070        | 0.687–1.664             | 0.768           |
| GC therapy                     | 1.002        | 0.639–1.570             | 0.993           |
| Both therapies                 | 0.953        | 0.630–1.443             | 0.822           |
| Age of 5–9 years               |              |                         |                 |
| Factor                         | Hazard ratio | 95% Confidence interval | <i>p</i> -value |
| Female (vs. male)              | 1.114        | 0.825–1.504             | 0.482           |
| Pre-admission fever, days      | 0.801        | 0.710–0.904             | <0.001          |
| Influenza B (vs. influenza A)  | 1.321        | 0.956–1.825             | 0.091           |
| LRI on admission (vs. URI)     | 0.513        | 0.287–0.915             | 0.024           |
| Type of administered treatment |              |                         |                 |
| No therapy                     | reference    |                         |                 |
| NAI therapy                    | 0.810        | 0.449–1.460             | 0.483           |
| GC therapy                     | 0.833        | 0.453–1.531             | 0.557           |
| Both therapies                 | 1.035        | 0.599–1.789             | 0.900           |
| Age of ≥10 years               |              |                         |                 |
| Factor                         | Hazard ratio | 95% Confidence interval | <i>p</i> -value |
| Female (vs. male)              | 1.479        | 0.915–2.392             | 0.110           |
| Pre-admission fever, days      | 0.742        | 0.636–0.866             | <0.001          |
| Influenza B (vs. influenza A)  | 0.880        | 0.532–1.456             | 0.619           |
| LRI on admission (vs. URI)     | 0.737        | 0.309–1.757             | 0.491           |
| Type of administered treatment |              |                         |                 |
| No therapy                     | reference    |                         |                 |
| NAI therapy                    | 0.587        | 0.237–1.456             | 0.250           |
| GC therapy                     | 0.388        | 0.129–1.168             | 0.092           |
| Both therapies                 | 0.551        | 0.230–1.319             | 0.181           |

LRI, lower respiratory tract infection; URI, upper respiratory tract infection; NAI, neuraminidase inhibitor; GC, glucocorticoid.
